# Supplementary material for: The formation mechanism of metal cluster fullerenes Sc3N@Cn: force field development and molecular dynamics simulations
Source: Royal Society of Chemistry journal article supplement (doi:10.1039/d4cp03280b), 2024-12-23
Supplement: d4cp03280b1.pdf [file d4cp03280b1.pdf]

## Supplementary Information

### Formation mechanism of metal cluster fullerenes $\text{Sc}_3\text{N}@C_n$ : force field development and molecular dynamics simulation

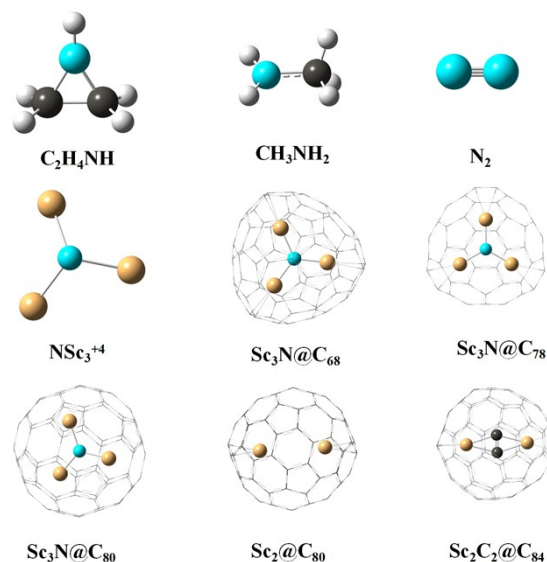

Fig. S1 The structures of training set

Table S1 The structural parameters of  $\text{Sc}_3\text{N}@C_{80}$  from CNSc.ff and density functional theory (DFT) at B3LYP/6-31G level

|                                  | Bond    |           |       | Angle                                            |           |       |       |
|----------------------------------|---------|-----------|-------|--------------------------------------------------|-----------|-------|-------|
|                                  | CNSc.ff | DFT/6-31G | Error | CNSc.ff                                          | DFT/6-31G | Error |       |
| C <sub>1</sub> -C <sub>2</sub>   | 1.433   | 1.438     | 0.35% | C <sub>2</sub> -C <sub>1</sub> -C <sub>3</sub>   | 120.6     | 120.8 | 0.17% |
| C <sub>1</sub> -C <sub>3</sub>   | 1.436   | 1.440     | 0.28% | C <sub>1</sub> -C <sub>3</sub> -C <sub>4</sub>   | 117.7     | 117.7 | 0.0%  |
| C <sub>3</sub> -C <sub>4</sub>   | 1.433   | 1.429     | 0.28% | C <sub>3</sub> -C <sub>4</sub> -C <sub>5</sub>   | 121.2     | 120.9 | 0.25% |
| C <sub>4</sub> -C <sub>5</sub>   | 1.436   | 1.441     | 0.35% | C <sub>4</sub> -C <sub>5</sub> -C <sub>6</sub>   | 121.1     | 121.5 | 0.33% |
| C <sub>5</sub> -C <sub>6</sub>   | 1.426   | 1.423     | 0.21% | C <sub>2</sub> -C <sub>1</sub> -C <sub>7</sub>   | 108.2     | 108.5 | 0.28% |
| C <sub>1</sub> -C <sub>7</sub>   | 1.446   | 1.453     | 0.48% | C <sub>1</sub> -C <sub>2</sub> -C <sub>8</sub>   | 107.9     | 108.3 | 0.37% |
| C <sub>2</sub> -C <sub>8</sub>   | 1.437   | 1.441     | 0.28% | C <sub>1</sub> -C <sub>3</sub> -C <sub>9</sub>   | 116.7     | 116.9 | 0.17% |
| C <sub>3</sub> -C <sub>9</sub>   | 1.430   | 1.426     | 0.28% | C <sub>3</sub> -C <sub>4</sub> -C <sub>10</sub>  | 121.3     | 120.7 | 0.50% |
| C <sub>4</sub> -C <sub>10</sub>  | 1.439   | 1.444     | 0.35% | C <sub>4</sub> -C <sub>5</sub> -C <sub>11</sub>  | 108.8     | 108.1 | 0.65% |
| C <sub>5</sub> -C <sub>11</sub>  | 1.446   | 1.451     | 0.34% | C <sub>2</sub> -C <sub>8</sub> -C <sub>12</sub>  | 108.5     | 108.6 | 0.09% |
| C <sub>8</sub> -C <sub>12</sub>  | 1.445   | 1.451     | 0.41% | C <sub>5</sub> -C <sub>6</sub> -C <sub>13</sub>  | 117.2     | 117.9 | 0.59% |
| C <sub>6</sub> -C <sub>13</sub>  | 1.432   | 1.436     | 0.28% | C <sub>4</sub> -C <sub>10</sub> -C <sub>14</sub> | 107.8     | 108.1 | 0.28% |
| C <sub>10</sub> -C <sub>14</sub> | 1.432   | 1.439     | 0.49% | C <sub>1</sub> -C <sub>7</sub> -C <sub>15</sub>  | 120.4     | 119.8 | 0.50% |
| C <sub>7</sub> -C <sub>15</sub>  | 1.448   | 1.450     | 0.14% | C <sub>7</sub> -C <sub>15</sub> -C <sub>16</sub> | 116.8     | 116.7 | 0.09% |
| C <sub>15</sub> -C <sub>16</sub> | 1.436   | 1.437     | 0.07% | C <sub>3</sub> -C <sub>9</sub> -C <sub>17</sub>  | 121.2     | 121.2 | 0.00% |
| C <sub>9</sub> -C <sub>17</sub>  | 1.434   | 1.439     | 0.35% | C <sub>2</sub> -C <sub>8</sub> -C <sub>18</sub>  | 120.5     | 121.0 | 0.41% |
| C <sub>8</sub> -C <sub>18</sub>  | 1.432   | 1.436     | 0.28% | C <sub>9</sub> -C <sub>17</sub> -C <sub>19</sub> | 121.5     | 120.9 | 0.50% |
| C <sub>17</sub> -C <sub>19</sub> | 1.434   | 1.433     | 0.07% | C <sub>8</sub> -C <sub>18</sub> -C <sub>20</sub> | 117.4     | 116.9 | 0.43% |

|                                  |       |       |       |                                                   |       |       |       |
|----------------------------------|-------|-------|-------|---------------------------------------------------|-------|-------|-------|
| C <sub>18</sub> -C <sub>20</sub> | 1.430 | 1.432 | 0.14% | C <sub>6</sub> -C <sub>13</sub> -C <sub>21</sub>  | 122.4 | 122.4 | 0.00% |
| C <sub>13</sub> -C <sub>21</sub> | 1.449 | 1.451 | 0.14% | C <sub>5</sub> -C <sub>11</sub> -C <sub>22</sub>  | 122.0 | 122.4 | 0.38% |
| C <sub>11</sub> -C <sub>22</sub> | 1.436 | 1.437 | 0.07% | C <sub>8</sub> -C <sub>12</sub> -C <sub>23</sub>  | 120.4 | 119.7 | 0.53% |
| C <sub>12</sub> -C <sub>23</sub> | 1.449 | 1.452 | 0.21% | C <sub>15</sub> -C <sub>16</sub> -C <sub>24</sub> | 122.0 | 122.4 | 0.33% |
| C <sub>16</sub> -C <sub>24</sub> | 1.446 | 1.451 | 0.34% | C <sub>16</sub> -C <sub>24</sub> -C <sub>25</sub> | 108.8 | 108.1 | 0.65% |
| C <sub>24</sub> -C <sub>25</sub> | 1.440 | 1.441 | 0.07% | C <sub>7</sub> -C <sub>15</sub> -C <sub>26</sub>  | 116.5 | 116.3 | 0.17% |
| C <sub>15</sub> -C <sub>26</sub> | 1.445 | 1.452 | 0.48% | C <sub>10</sub> -C <sub>14</sub> -C <sub>27</sub> | 121.2 | 121.2 | 0.00% |
| C <sub>14</sub> -C <sub>27</sub> | 1.430 | 1.426 | 0.28% | C <sub>18</sub> -C <sub>20</sub> -C <sub>28</sub> | 121.9 | 121.2 | 0.58% |
| C <sub>20</sub> -C <sub>28</sub> | 1.433 | 1.438 | 0.35% | C <sub>8</sub> -C <sub>18</sub> -C <sub>29</sub>  | 117.2 | 117.9 | 0.59% |
| C <sub>18</sub> -C <sub>29</sub> | 1.430 | 1.423 | 0.49% | C <sub>20</sub> -C <sub>28</sub> -C <sub>30</sub> | 108.2 | 108.5 | 0.28% |
| C <sub>28</sub> -C <sub>30</sub> | 1.446 | 1.453 | 0.48% | C <sub>17</sub> -C <sub>19</sub> -C <sub>31</sub> | 117.2 | 117.7 | 0.42% |
| C <sub>19</sub> -C <sub>31</sub> | 1.434 | 1.433 | 0.07% | C <sub>12</sub> -C <sub>23</sub> -C <sub>32</sub> | 116.5 | 116.3 | 0.17% |
| C <sub>23</sub> -C <sub>32</sub> | 1.444 | 1.450 | 0.41% | C <sub>11</sub> -C <sub>22</sub> -C <sub>33</sub> | 116.9 | 116.7 | 0.17% |
| C <sub>22</sub> -C <sub>33</sub> | 1.443 | 1.450 | 0.48% | C <sub>12</sub> -C <sub>23</sub> -C <sub>34</sub> | 117.2 | 117.1 | 0.09% |
| C <sub>23</sub> -C <sub>34</sub> | 1.436 | 1.437 | 0.07% | C <sub>14</sub> -C <sub>27</sub> -C <sub>35</sub> | 117.4 | 118.1 | 0.59% |
| C <sub>27</sub> -C <sub>35</sub> | 1.431 | 1.429 | 0.14% | C <sub>14</sub> -C <sub>27</sub> -C <sub>36</sub> | 116.7 | 116.9 | 0.17% |
| C <sub>27</sub> -C <sub>36</sub> | 1.433 | 1.440 | 0.49% | C <sub>15</sub> -C <sub>26</sub> -C <sub>37</sub> | 120.4 | 119.7 | 0.58% |
| C <sub>26</sub> -C <sub>37</sub> | 1.445 | 1.451 | 0.41% | C <sub>16</sub> -C <sub>24</sub> -C <sub>38</sub> | 120.7 | 120.3 | 0.33% |
| C <sub>24</sub> -C <sub>38</sub> | 1.429 | 1.423 | 0.42% | C <sub>24</sub> -C <sub>25</sub> -C <sub>39</sub> | 121.2 | 120.9 | 0.25% |
| C <sub>25</sub> -C <sub>39</sub> | 1.433 | 1.429 | 0.28% | C <sub>25</sub> -C <sub>39</sub> -C <sub>40</sub> | 117.5 | 118.1 | 0.51% |
| C <sub>39</sub> -C <sub>40</sub> | 1.430 | 1.426 | 0.28% | C <sub>18</sub> -C <sub>29</sub> -C <sub>41</sub> | 121.1 | 121.5 | 0.33% |
| C <sub>29</sub> -C <sub>41</sub> | 1.433 | 1.441 | 0.56% | C <sub>29</sub> -C <sub>41</sub> -C <sub>42</sub> | 121.3 | 120.9 | 0.33% |
| C <sub>41</sub> -C <sub>42</sub> | 1.433 | 1.429 | 0.28% | C <sub>28</sub> -C <sub>30</sub> -C <sub>43</sub> | 120.4 | 119.8 | 0.50% |
| C <sub>30</sub> -C <sub>43</sub> | 1.443 | 1.450 | 0.48% | C <sub>30</sub> -C <sub>43</sub> -C <sub>44</sub> | 116.5 | 116.3 | 0.17% |
| C <sub>43</sub> -C <sub>44</sub> | 1.444 | 1.452 | 0.55% | C <sub>23</sub> -C <sub>32</sub> -C <sub>45</sub> | 120.4 | 119.8 | 0.50% |
| C <sub>32</sub> -C <sub>45</sub> | 1.446 | 1.453 | 0.48% | C <sub>23</sub> -C <sub>34</sub> -C <sub>46</sub> | 122.4 | 122.8 | 0.33% |
| C <sub>34</sub> -C <sub>46</sub> | 1.446 | 1.452 | 0.41% | C <sub>27</sub> -C <sub>35</sub> -C <sub>47</sub> | 121.2 | 120.9 | 0.25% |
| C <sub>35</sub> -C <sub>47</sub> | 1.433 | 1.441 | 0.56% | C <sub>32</sub> -C <sub>45</sub> -C <sub>48</sub> | 108.2 | 108.5 | 0.28% |
| C <sub>45</sub> -C <sub>48</sub> | 1.430 | 1.438 | 0.56% | C <sub>27</sub> -C <sub>36</sub> -C <sub>49</sub> | 120.5 | 120.8 | 0.25% |
| C <sub>36</sub> -C <sub>49</sub> | 1.430 | 1.438 | 0.56% | C <sub>34</sub> -C <sub>46</sub> -C <sub>50</sub> | 108.8 | 108.2 | 0.55% |
| C <sub>46</sub> -C <sub>50</sub> | 1.432 | 1.439 | 0.49% | C <sub>24</sub> -C <sub>38</sub> -C <sub>51</sub> | 117.4 | 117.7 | 0.25% |
| C <sub>38</sub> -C <sub>51</sub> | 1.430 | 1.432 | 0.14% | C <sub>35</sub> -C <sub>47</sub> -C <sub>52</sub> | 108.8 | 108.1 | 0.65% |
| C <sub>47</sub> -C <sub>52</sub> | 1.440 | 1.451 | 0.76% | C <sub>38</sub> -C <sub>51</sub> -C <sub>53</sub> | 121.9 | 121.2 | 0.58% |
| C <sub>51</sub> -C <sub>53</sub> | 1.430 | 1.438 | 0.56% | C <sub>34</sub> -C <sub>46</sub> -C <sub>54</sub> | 120.8 | 120.6 | 0.17% |
| C <sub>46</sub> -C <sub>54</sub> | 1.430 | 1.426 | 0.28% | C <sub>36</sub> -C <sub>49</sub> -C <sub>55</sub> | 107.9 | 108.3 | 0.37% |
| C <sub>49</sub> -C <sub>55</sub> | 1.430 | 1.441 | 0.76% | C <sub>41</sub> -C <sub>42</sub> -C <sub>56</sub> | 117.5 | 118.1 | 0.51% |
| C <sub>42</sub> -C <sub>56</sub> | 1.430 | 1.426 | 0.28% | C <sub>30</sub> -C <sub>43</sub> -C <sub>57</sub> | 116.9 | 116.7 | 0.17% |
| C <sub>43</sub> -C <sub>57</sub> | 1.436 | 1.437 | 0.07% | C <sub>35</sub> -C <sub>47</sub> -C <sub>58</sub> | 121.1 | 121.5 | 0.33% |
| C <sub>47</sub> -C <sub>58</sub> | 1.430 | 1.423 | 0.49% | C <sub>45</sub> -C <sub>48</sub> -C <sub>59</sub> | 121.9 | 121.2 | 0.58% |
| C <sub>48</sub> -C <sub>59</sub> | 1.430 | 1.432 | 0.14% | C <sub>48</sub> -C <sub>59</sub> -C <sub>60</sub> | 117.4 | 116.9 | 0.43% |
| C <sub>59</sub> -C <sub>60</sub> | 1.432 | 1.436 | 0.28% | C <sub>51</sub> -C <sub>53</sub> -C <sub>61</sub> | 108.2 | 108.5 | 0.28% |
| C <sub>53</sub> -C <sub>61</sub> | 1.446 | 1.453 | 0.48% | C <sub>46</sub> -C <sub>50</sub> -C <sub>62</sub> | 121.5 | 120.9 | 0.50% |
| C <sub>50</sub> -C <sub>62</sub> | 1.434 | 1.433 | 0.07% | C <sub>47</sub> -C <sub>52</sub> -C <sub>63</sub> | 122.0 | 122.4 | 0.33% |
| C <sub>52</sub> -C <sub>63</sub> | 1.436 | 1.437 | 0.07% | C <sub>50</sub> -C <sub>62</sub> -C <sub>64</sub> | 117.2 | 117.7 | 0.42% |

|                                   |       |       |       |                                                    |       |       |       |
|-----------------------------------|-------|-------|-------|----------------------------------------------------|-------|-------|-------|
| C <sub>62</sub> -C <sub>64</sub>  | 1.434 | 1.433 | 0.07% | C <sub>43</sub> -C <sub>57</sub> -C <sub>65</sub>  | 122.0 | 122.4 | 0.33% |
| C <sub>57</sub> -C <sub>65</sub>  | 1.441 | 1.451 | 0.69% | C <sub>57</sub> -C <sub>65</sub> -C <sub>66</sub>  | 120.7 | 120.3 | 0.33% |
| C <sub>65</sub> -C <sub>66</sub>  | 1.430 | 1.423 | 0.49% | C <sub>46</sub> -C <sub>54</sub> -C <sub>67</sub>  | 117.5 | 118.1 | 0.51% |
| C <sub>54</sub> -C <sub>67</sub>  | 1.433 | 1.429 | 0.28% | C <sub>59</sub> -C <sub>60</sub> -C <sub>68</sub>  | 122.3 | 122.4 | 0.08% |
| C <sub>60</sub> -C <sub>68</sub>  | 1.442 | 1.451 | 0.62% | C <sub>47</sub> -C <sub>58</sub> -C <sub>69</sub>  | 117.2 | 117.9 | 0.59% |
| C <sub>58</sub> -C <sub>69</sub>  | 1.432 | 1.436 | 0.28% | C <sub>48</sub> -C <sub>59</sub> -C <sub>70</sub>  | 117.4 | 117.7 | 0.25% |
| C <sub>59</sub> -C <sub>70</sub>  | 1.430 | 1.423 | 0.49% | C <sub>50</sub> -C <sub>62</sub> -C <sub>71</sub>  | 117.2 | 117.7 | 0.42% |
| C <sub>62</sub> -C <sub>71</sub>  | 1.434 | 1.433 | 0.07% | C <sub>57</sub> -C <sub>65</sub> -C <sub>72</sub>  | 108.8 | 108.1 | 0.65% |
| C <sub>65</sub> -C <sub>72</sub>  | 1.433 | 1.441 | 0.56% | C <sub>58</sub> -C <sub>69</sub> -C <sub>73</sub>  | 122.3 | 122.4 | 0.08% |
| C <sub>69</sub> -C <sub>73</sub>  | 1.445 | 1.451 | 0.41% | C <sub>65</sub> -C <sub>66</sub> -C <sub>74</sub>  | 117.4 | 117.7 | 0.25% |
| C <sub>66</sub> -C <sub>74</sub>  | 1.430 | 1.432 | 0.14% | C <sub>60</sub> -C <sub>68</sub> -C <sub>75</sub>  | 120.4 | 119.7 | 0.58% |
| C <sub>68</sub> -C <sub>75</sub>  | 1.444 | 1.452 | 0.55% | C <sub>68</sub> -C <sub>75</sub> -C <sub>76</sub>  | 117.3 | 117.1 | 0.17% |
| C <sub>75</sub> -C <sub>76</sub>  | 1.436 | 1.437 | 0.07% | C <sub>62</sub> -C <sub>71</sub> -C <sub>77</sub>  | 121.5 | 120.9 | 0.50% |
| C <sub>71</sub> -C <sub>77</sub>  | 1.432 | 1.439 | 0.49% | C <sub>71</sub> -C <sub>77</sub> -C <sub>78</sub>  | 121.2 | 121.2 | 0.00% |
| C <sub>77</sub> -C <sub>78</sub>  | 1.430 | 1.426 | 0.28% | C <sub>68</sub> -C <sub>75</sub> -C <sub>79</sub>  | 116.5 | 116.3 | 0.17% |
| C <sub>75</sub> -C <sub>79</sub>  | 1.443 | 1.450 | 0.48% | C <sub>66</sub> -C <sub>74</sub> -C <sub>80</sub>  | 121.9 | 121.2 | 0.58% |
| C <sub>74</sub> -C <sub>80</sub>  | 1.430 | 1.438 | 0.56% | C <sub>47</sub> -C <sub>58</sub> -N <sub>81</sub>  | 81.3  | 81.9  | 0.73% |
| N <sub>81</sub> -Sc <sub>82</sub> | 2.024 | 2.025 | 0.05% | C <sub>58</sub> -N <sub>81</sub> -Sc <sub>82</sub> | 54.7  | 54.8  | 0.18% |
| N <sub>81</sub> -Sc <sub>83</sub> | 2.023 | 2.025 | 0.1%  | C <sub>58</sub> -N <sub>81</sub> -Sc <sub>83</sub> | 69.1  | 69.2  | 0.14% |
| N <sub>81</sub> -Sc <sub>84</sub> | 2.024 | 2.025 | 0.05% | C <sub>58</sub> -N <sub>81</sub> -Sc <sub>84</sub> | 159.0 | 158.9 | 0.06% |

Table S2 The structural parameters of Sc<sub>2</sub>C<sub>2</sub>@C<sub>84</sub> from CNSc.ff and density functional theory (DFT) at B3LYP/6-31G level

|                                  | Bond    |           |       | Angle                                             |           |       |       |
|----------------------------------|---------|-----------|-------|---------------------------------------------------|-----------|-------|-------|
|                                  | CNSc.ff | DFT/6-31G | Error | CNSc.ff                                           | DFT/6-31G | Error |       |
| C <sub>2</sub> -C <sub>1</sub>   | 1.452   | 1.462     | 0.68% | C <sub>3</sub> -C <sub>2</sub> -C <sub>1</sub>    | 122.4     | 122.4 | 0.00% |
| C <sub>3</sub> -C <sub>2</sub>   | 1.415   | 1.406     | 0.64% | C <sub>4</sub> -C <sub>3</sub> -C <sub>2</sub>    | 119.1     | 119.0 | 0.08% |
| C <sub>4</sub> -C <sub>3</sub>   | 1.470   | 1.479     | 0.61% | C <sub>5</sub> -C <sub>4</sub> -C <sub>3</sub>    | 117.9     | 117.8 | 0.08% |
| C <sub>5</sub> -C <sub>4</sub>   | 1.443   | 1.452     | 0.62% | C <sub>6</sub> -C <sub>5</sub> -C <sub>4</sub>    | 118.8     | 118.0 | 0.68% |
| C <sub>6</sub> -C <sub>5</sub>   | 1.445   | 1.451     | 0.41% | C <sub>7</sub> -C <sub>6</sub> -C <sub>5</sub>    | 108.2     | 108.4 | 0.18% |
| C <sub>7</sub> -C <sub>6</sub>   | 1.423   | 1.425     | 0.14% | C <sub>8</sub> -C <sub>7</sub> -C <sub>6</sub>    | 120.9     | 121.9 | 0.82% |
| C <sub>8</sub> -C <sub>7</sub>   | 1.427   | 1.429     | 0.14% | C <sub>9</sub> -C <sub>8</sub> -C <sub>7</sub>    | 114.8     | 115.7 | 0.78% |
| C <sub>9</sub> -C <sub>8</sub>   | 1.418   | 1.411     | 0.50% | C <sub>10</sub> -C <sub>9</sub> -C <sub>8</sub>   | 120.6     | 120.1 | 0.42% |
| C <sub>10</sub> -C <sub>9</sub>  | 1.428   | 1.436     | 0.56% | C <sub>11</sub> -C <sub>10</sub> -C <sub>9</sub>  | 109.4     | 109.3 | 0.09% |
| C <sub>11</sub> -C <sub>10</sub> | 1.439   | 1.449     | 0.69% | C <sub>12</sub> -C <sub>11</sub> -C <sub>10</sub> | 121.8     | 121.0 | 0.66% |
| C <sub>12</sub> -C <sub>11</sub> | 1.422   | 1.415     | 0.49% | C <sub>13</sub> -C <sub>12</sub> -C <sub>11</sub> | 118.3     | 118.2 | 0.08% |
| C <sub>13</sub> -C <sub>12</sub> | 1.462   | 1.471     | 0.61% | C <sub>14</sub> -C <sub>13</sub> -C <sub>12</sub> | 120.2     | 119.9 | 0.25% |
| C <sub>14</sub> -C <sub>13</sub> | 1.457   | 1.465     | 0.55% | C <sub>15</sub> -C <sub>14</sub> -C <sub>13</sub> | 120.7     | 120.5 | 0.17% |
| C <sub>15</sub> -C <sub>14</sub> | 1.417   | 1.411     | 0.43% | C <sub>16</sub> -C <sub>15</sub> -C <sub>14</sub> | 121.2     | 120.5 | 0.58% |
| C <sub>16</sub> -C <sub>15</sub> | 1.455   | 1.463     | 0.55% | C <sub>17</sub> -C <sub>16</sub> -C <sub>15</sub> | 106.9     | 107.1 | 0.19% |
| C <sub>17</sub> -C <sub>16</sub> | 1.439   | 1.445     | 0.42% | C <sub>18</sub> -C <sub>17</sub> -C <sub>16</sub> | 119.8     | 120.3 | 0.42% |
| C <sub>18</sub> -C <sub>17</sub> | 1.383   | 1.378     | 0.36% | C <sub>19</sub> -C <sub>18</sub> -C <sub>17</sub> | 119.3     | 119.9 | 0.50% |
| C <sub>19</sub> -C <sub>18</sub> | 1.433   | 1.442     | 0.62% | C <sub>20</sub> -C <sub>19</sub> -C <sub>18</sub> | 105.6     | 106.4 | 0.75% |

|                                  |       |       |       |                                                   |       |       |       |
|----------------------------------|-------|-------|-------|---------------------------------------------------|-------|-------|-------|
| C <sub>20</sub> -C <sub>19</sub> | 1.440 | 1.449 | 0.62% | C <sub>21</sub> -C <sub>20</sub> -C <sub>19</sub> | 120.2 | 120.3 | 0.08% |
| C <sub>21</sub> -C <sub>20</sub> | 1.381 | 1.379 | 0.15% | C <sub>22</sub> -C <sub>21</sub> -C <sub>20</sub> | 120.2 | 120.4 | 0.17% |
| C <sub>22</sub> -C <sub>21</sub> | 1.439 | 1.449 | 0.69% | C <sub>23</sub> -C <sub>22</sub> -C <sub>21</sub> | 105.7 | 106.5 | 0.75% |
| C <sub>23</sub> -C <sub>22</sub> | 1.433 | 1.440 | 0.49% | C <sub>24</sub> -C <sub>23</sub> -C <sub>22</sub> | 119.3 | 119.7 | 0.33% |
| C <sub>24</sub> -C <sub>23</sub> | 1.383 | 1.379 | 0.29% | C <sub>25</sub> -C <sub>4</sub> -C <sub>3</sub>   | 118.9 | 118.9 | 0.00% |
| C <sub>25</sub> -C <sub>4</sub>  | 1.415 | 1.407 | 0.57% | C <sub>26</sub> -C <sub>25</sub> -C <sub>4</sub>  | 122.6 | 122.8 | 0.16% |
| C <sub>26</sub> -C <sub>25</sub> | 1.458 | 1.466 | 0.55% | C <sub>27</sub> -C <sub>26</sub> -C <sub>25</sub> | 121.6 | 120.6 | 0.83% |
| C <sub>27</sub> -C <sub>26</sub> | 1.418 | 1.411 | 0.50% | C <sub>28</sub> -C <sub>27</sub> -C <sub>26</sub> | 120.8 | 120.7 | 0.08% |
| C <sub>28</sub> -C <sub>27</sub> | 1.458 | 1.466 | 0.55% | C <sub>29</sub> -C <sub>8</sub> -C <sub>7</sub>   | 119.1 | 118.2 | 0.76% |
| C <sub>29</sub> -C <sub>8</sub>  | 1.458 | 1.466 | 0.55% | C <sub>30</sub> -C <sub>29</sub> -C <sub>8</sub>  | 116.5 | 117.0 | 0.43% |
| C <sub>30</sub> -C <sub>29</sub> | 1.412 | 1.416 | 0.28% | C <sub>31</sub> -C <sub>10</sub> -C <sub>9</sub>  | 119.3 | 119.9 | 0.50% |
| C <sub>31</sub> -C <sub>10</sub> | 1.390 | 1.380 | 0.72% | C <sub>32</sub> -C <sub>31</sub> -C <sub>10</sub> | 119.3 | 120.1 | 0.67% |
| C <sub>32</sub> -C <sub>31</sub> | 1.427 | 1.436 | 0.63% | C <sub>33</sub> -C <sub>32</sub> -C <sub>31</sub> | 120.6 | 119.9 | 0.58% |
| C <sub>33</sub> -C <sub>32</sub> | 1.417 | 1.411 | 0.43% | C <sub>34</sub> -C <sub>33</sub> -C <sub>32</sub> | 115.4 | 115.9 | 0.43% |
| C <sub>34</sub> -C <sub>33</sub> | 1.427 | 1.427 | 0.00% | C <sub>35</sub> -C <sub>34</sub> -C <sub>33</sub> | 121.8 | 122.0 | 0.16% |
| C <sub>35</sub> -C <sub>34</sub> | 1.421 | 1.424 | 0.21% | C <sub>36</sub> -C <sub>35</sub> -C <sub>34</sub> | 108.3 | 108.3 | 0.00% |
| C <sub>36</sub> -C <sub>35</sub> | 1.445 | 1.451 | 0.41% | C <sub>37</sub> -C <sub>16</sub> -C <sub>15</sub> | 122.6 | 122.7 | 0.08% |
| C <sub>37</sub> -C <sub>16</sub> | 1.417 | 1.408 | 0.64% | C <sub>38</sub> -C <sub>37</sub> -C <sub>16</sub> | 118.9 | 118.8 | 0.08% |
| C <sub>38</sub> -C <sub>37</sub> | 1.470 | 1.479 | 0.61% | C <sub>39</sub> -C <sub>38</sub> -C <sub>37</sub> | 118.9 | 118.8 | 0.08% |
| C <sub>39</sub> -C <sub>38</sub> | 1.417 | 1.408 | 0.64% | C <sub>40</sub> -C <sub>20</sub> -C <sub>19</sub> | 109.7 | 109.4 | 0.27% |
| C <sub>40</sub> -C <sub>20</sub> | 1.427 | 1.437 | 0.70% | C <sub>41</sub> -C <sub>1</sub> -C <sub>21</sub>  | 120.7 | 120.3 | 0.33% |
| C <sub>41</sub> -C <sub>1</sub>  | 1.418 | 1.413 | 0.35% | C <sub>42</sub> -C <sub>19</sub> -C <sub>18</sub> | 122.1 | 121.5 | 0.49% |
| C <sub>42</sub> -C <sub>19</sub> | 1.412 | 1.416 | 0.28% | C <sub>43</sub> -C <sub>42</sub> -C <sub>19</sub> | 118.4 | 118.3 | 0.08% |
| C <sub>43</sub> -C <sub>42</sub> | 1.465 | 1.471 | 0.41% | C <sub>44</sub> -C <sub>43</sub> -C <sub>42</sub> | 118.3 | 118.3 | 0.00% |
| C <sub>44</sub> -C <sub>43</sub> | 1.412 | 1.416 | 0.28% | C <sub>45</sub> -C <sub>15</sub> -C <sub>14</sub> | 120.9 | 120.3 | 0.50% |
| C <sub>45</sub> -C <sub>15</sub> | 1.429 | 1.437 | 0.56% | C <sub>46</sub> -C <sub>45</sub> -C <sub>15</sub> | 119.2 | 119.8 | 0.50% |
| C <sub>46</sub> -C <sub>45</sub> | 1.388 | 1.379 | 0.65% | C <sub>47</sub> -C <sub>13</sub> -C <sub>12</sub> | 118.5 | 118.4 | 0.08% |
| C <sub>47</sub> -C <sub>13</sub> | 1.412 | 1.416 | 0.28% | C <sub>48</sub> -C <sub>47</sub> -C <sub>13</sub> | 122.0 | 121.5 | 0.41% |
| C <sub>48</sub> -C <sub>47</sub> | 1.433 | 1.440 | 0.49% | C <sub>49</sub> -C <sub>48</sub> -C <sub>47</sub> | 119.3 | 119.7 | 0.33% |
| C <sub>49</sub> -C <sub>48</sub> | 1.382 | 1.379 | 0.22% | C <sub>50</sub> -C <sub>49</sub> -C <sub>48</sub> | 119.9 | 120.4 | 0.42% |
| C <sub>50</sub> -C <sub>49</sub> | 1.440 | 1.445 | 0.35% | C <sub>51</sub> -C <sub>50</sub> -C <sub>49</sub> | 121.1 | 120.6 | 0.41% |
| C <sub>51</sub> -C <sub>50</sub> | 1.415 | 1.407 | 0.57% | C <sub>52</sub> -C <sub>7</sub> -C <sub>6</sub>   | 108.3 | 108.4 | 0.09% |
| C <sub>52</sub> -C <sub>7</sub>  | 1.443 | 1.451 | 0.55% | C <sub>53</sub> -C <sub>52</sub> -C <sub>7</sub>  | 107.7 | 108.3 | 0.55% |
| C <sub>53</sub> -C <sub>52</sub> | 1.453 | 1.461 | 0.55% | C <sub>54</sub> -C <sub>53</sub> -C <sub>52</sub> | 118.2 | 117.6 | 0.51% |
| C <sub>54</sub> -C <sub>53</sub> | 1.449 | 1.454 | 0.34% | C <sub>55</sub> -C <sub>3</sub> -C <sub>2</sub>   | 115.6 | 116.6 | 0.86% |
| C <sub>55</sub> -C <sub>3</sub>  | 1.439 | 1.448 | 0.62% | C <sub>56</sub> -C <sub>41</sub> -C <sub>1</sub>  | 115.2 | 116.1 | 0.78% |
| C <sub>56</sub> -C <sub>41</sub> | 1.426 | 1.427 | 0.07% | C <sub>57</sub> -C <sub>56</sub> -C <sub>41</sub> | 120.8 | 121.8 | 0.82% |
| C <sub>57</sub> -C <sub>56</sub> | 1.422 | 1.424 | 0.14% | C <sub>58</sub> -C <sub>57</sub> -C <sub>56</sub> | 121.0 | 121.8 | 0.66% |
| C <sub>58</sub> -C <sub>57</sub> | 1.426 | 1.427 | 0.07% | C <sub>59</sub> -C <sub>58</sub> -C <sub>57</sub> | 115.3 | 116.1 | 0.69% |
| C <sub>59</sub> -C <sub>58</sub> | 1.418 | 1.413 | 0.35% | C <sub>60</sub> -C <sub>48</sub> -C <sub>47</sub> | 109.6 | 109.1 | 0.46% |
| C <sub>60</sub> -C <sub>48</sub> | 1.439 | 1.446 | 0.48% | C <sub>61</sub> -C <sub>60</sub> -C <sub>48</sub> | 121.0 | 120.5 | 0.41% |
| C <sub>61</sub> -C <sub>60</sub> | 1.415 | 1.406 | 0.64% | C <sub>62</sub> -C <sub>61</sub> -C <sub>60</sub> | 115.6 | 116.6 | 0.86% |
| C <sub>62</sub> -C <sub>61</sub> | 1.438 | 1.448 | 0.69% | C <sub>63</sub> -C <sub>40</sub> -C <sub>20</sub> | 120.9 | 120.3 | 0.50% |
| C <sub>63</sub> -C <sub>40</sub> | 1.417 | 1.411 | 0.43% | C <sub>64</sub> -C <sub>22</sub> -C <sub>21</sub> | 121.9 | 121.1 | 0.66% |

|                                   |       |       |       |                                                    |       |       |       |
|-----------------------------------|-------|-------|-------|----------------------------------------------------|-------|-------|-------|
| C <sub>64</sub> -C <sub>22</sub>  | 1.412 | 1.416 | 0.28% | C <sub>65</sub> -C <sub>64</sub> -C <sub>22</sub>  | 118.5 | 118.4 | 0.08% |
| C <sub>65</sub> -C <sub>64</sub>  | 1.466 | 1.471 | 0.34% | C <sub>66</sub> -C <sub>65</sub> -C <sub>64</sub>  | 118.3 | 118.2 | 0.08% |
| C <sub>66</sub> -C <sub>65</sub>  | 1.412 | 1.415 | 0.21% | C <sub>67</sub> -C <sub>26</sub> -C <sub>25</sub>  | 107.4 | 107.2 | 0.19% |
| C <sub>67</sub> -C <sub>26</sub>  | 1.428 | 1.436 | 0.56% | C <sub>68</sub> -C <sub>67</sub> -C <sub>26</sub>  | 119.3 | 119.9 | 0.50% |
| C <sub>68</sub> -C <sub>67</sub>  | 1.390 | 1.380 | 0.72% | C <sub>69</sub> -C <sub>28</sub> -C <sub>27</sub>  | 116.5 | 117.0 | 0.43% |
| C <sub>69</sub> -C <sub>28</sub>  | 1.412 | 1.416 | 0.28% | C <sub>70</sub> -C <sub>69</sub> -C <sub>28</sub>  | 122.1 | 121.8 | 0.25% |
| C <sub>70</sub> -C <sub>69</sub>  | 1.433 | 1.441 | 0.56% | C <sub>71</sub> -C <sub>70</sub> -C <sub>69</sub>  | 119.2 | 119.7 | 0.42% |
| C <sub>71</sub> -C <sub>70</sub>  | 1.383 | 1.378 | 0.36% | C <sub>72</sub> -C <sub>71</sub> -C <sub>70</sub>  | 119.9 | 120.5 | 0.50% |
| C <sub>72</sub> -C <sub>71</sub>  | 1.436 | 1.446 | 0.69% | C <sub>73</sub> -C <sub>72</sub> -C <sub>71</sub>  | 121.1 | 120.4 | 0.58% |
| C <sub>73</sub> -C <sub>72</sub>  | 1.414 | 1.406 | 0.57% | C <sub>74</sub> -C <sub>34</sub> -C <sub>33</sub>  | 123.9 | 123.7 | 0.16% |
| C <sub>74</sub> -C <sub>34</sub>  | 1.445 | 1.450 | 0.34% | C <sub>75</sub> -C <sub>74</sub> -C <sub>34</sub>  | 107.6 | 108.4 | 0.74% |
| C <sub>75</sub> -C <sub>74</sub>  | 1.449 | 1.459 | 0.69% | C <sub>76</sub> -C <sub>75</sub> -C <sub>74</sub>  | 118.5 | 117.7 | 0.68% |
| C <sub>76</sub> -C <sub>75</sub>  | 1.448 | 1.457 | 0.62% | C <sub>77</sub> -C <sub>38</sub> -C <sub>37</sub>  | 118.6 | 117.7 | 0.76% |
| C <sub>77</sub> -C <sub>38</sub>  | 1.446 | 1.452 | 0.41% | C <sub>78</sub> -C <sub>63</sub> -C <sub>40</sub>  | 115.6 | 116.0 | 0.34% |
| C <sub>78</sub> -C <sub>63</sub>  | 1.427 | 1.429 | 0.14% | C <sub>79</sub> -C <sub>78</sub> -C <sub>63</sub>  | 120.8 | 121.7 | 0.74% |
| C <sub>79</sub> -C <sub>78</sub>  | 1.421 | 1.424 | 0.21% | C <sub>80</sub> -C <sub>79</sub> -C <sub>78</sub>  | 121.0 | 122.0 | 0.82% |
| C <sub>80</sub> -C <sub>79</sub>  | 1.427 | 1.427 | 0.00% | C <sub>81</sub> -C <sub>80</sub> -C <sub>79</sub>  | 115.7 | 115.9 | 0.17% |
| C <sub>81</sub> -C <sub>80</sub>  | 1.418 | 1.411 | 0.50% | C <sub>82</sub> -C <sub>70</sub> -C <sub>69</sub>  | 109.7 | 109.2 | 0.46% |
| C <sub>82</sub> -C <sub>70</sub>  | 1.437 | 1.446 | 0.62% | C <sub>83</sub> -C <sub>82</sub> -C <sub>70</sub>  | 121.1 | 120.4 | 0.58% |
| C <sub>83</sub> -C <sub>82</sub>  | 1.416 | 1.406 | 0.71% | C <sub>84</sub> -C <sub>79</sub> -C <sub>78</sub>  | 108.4 | 108.3 | 0.09% |
| C <sub>84</sub> -C <sub>79</sub>  | 1.445 | 1.450 | 0.34% | C <sub>85</sub> -C <sub>86</sub> -Sc <sub>87</sub> | 95.0  | 95.0  | 0.00% |
| C <sub>86</sub> -C <sub>85</sub>  | 1.264 | 1.272 | 0.63% | C <sub>43</sub> -C <sub>85</sub> -Sc <sub>88</sub> | 94.4  | 95.2  | 0.84% |
| C <sub>86</sub> -Sc <sub>87</sub> | 2.158 | 2.136 | 1.03% |                                                    |       |       |       |
| C <sub>85</sub> -Sc <sub>88</sub> | 2.159 | 2.140 | 0.89% |                                                    |       |       |       |

Table S3 The structural parameters of Sc<sub>2</sub>@C<sub>80</sub> from CNSc.ff and density functional theory (DFT) at B3LYP/6-31G level

|                                  | Bond    |           |       | Angle                                             |           |       |       |
|----------------------------------|---------|-----------|-------|---------------------------------------------------|-----------|-------|-------|
|                                  | CNSc.ff | DFT/6-31G | Error | CNSc.ff                                           | DFT/6-31G | Error |       |
| C <sub>1</sub> -C <sub>2</sub>   | 1.435   | 1.481     | 3.15% | C <sub>1</sub> -C <sub>2</sub> -C <sub>3</sub>    | 120.4     | 119.0 | 1.21% |
| C <sub>2</sub> -C <sub>3</sub>   | 1.438   | 1.483     | 3.03% | C <sub>2</sub> -C <sub>3</sub> -C <sub>4</sub>    | 108.8     | 108.8 | 0.07% |
| C <sub>3</sub> -C <sub>4</sub>   | 1.431   | 1.443     | 0.85% | C <sub>3</sub> -C <sub>4</sub> -C <sub>5</sub>    | 123.8     | 124.2 | 0.31% |
| C <sub>4</sub> -C <sub>5</sub>   | 1.431   | 1.437     | 0.40% | C <sub>4</sub> -C <sub>5</sub> -C <sub>6</sub>    | 117.8     | 117.8 | 0.00% |
| C <sub>5</sub> -C <sub>6</sub>   | 1.433   | 1.419     | 1.02% | C <sub>5</sub> -C <sub>6</sub> -C <sub>7</sub>    | 121.0     | 120.1 | 0.82% |
| C <sub>6</sub> -C <sub>7</sub>   | 1.434   | 1.439     | 0.29% | C <sub>6</sub> -C <sub>7</sub> -C <sub>8</sub>    | 108.0     | 107.8 | 0.16% |
| C <sub>7</sub> -C <sub>8</sub>   | 1.435   | 1.447     | 0.84% | C <sub>7</sub> -C <sub>8</sub> -C <sub>9</sub>    | 121.1     | 120.9 | 0.16% |
| C <sub>8</sub> -C <sub>9</sub>   | 1.433   | 1.416     | 1.19% | C <sub>8</sub> -C <sub>9</sub> -C <sub>10</sub>   | 118.0     | 118.4 | 0.26% |
| C <sub>9</sub> -C <sub>10</sub>  | 1.428   | 1.430     | 0.13% | C <sub>9</sub> -C <sub>10</sub> -C <sub>11</sub>  | 121.7     | 121.4 | 0.26% |
| C <sub>10</sub> -C <sub>11</sub> | 1.437   | 1.458     | 1.39% | C <sub>10</sub> -C <sub>11</sub> -C <sub>12</sub> | 106.4     | 106.2 | 0.14% |
| C <sub>11</sub> -C <sub>12</sub> | 1.436   | 1.465     | 2.01% | C <sub>11</sub> -C <sub>12</sub> -C <sub>13</sub> | 121.0     | 121.1 | 0.03% |
| C <sub>12</sub> -C <sub>13</sub> | 1.427   | 1.430     | 0.19% | C <sub>12</sub> -C <sub>13</sub> -C <sub>14</sub> | 116.8     | 117.6 | 0.63% |
| C <sub>13</sub> -C <sub>14</sub> | 1.435   | 1.416     | 1.39% | C <sub>13</sub> -C <sub>14</sub> -C <sub>15</sub> | 121.7     | 121.9 | 0.20% |
| C <sub>14</sub> -C <sub>15</sub> | 1.432   | 1.452     | 1.36% | C <sub>14</sub> -C <sub>15</sub> -C <sub>16</sub> | 108.8     | 108.4 | 0.33% |

|                                  |       |       |       |                                                   |       |       |       |
|----------------------------------|-------|-------|-------|---------------------------------------------------|-------|-------|-------|
| C <sub>15</sub> -C <sub>16</sub> | 1.432 | 1.430 | 0.15% | C <sub>15</sub> -C <sub>16</sub> -C <sub>17</sub> | 121.0 | 121.1 | 0.77% |
| C <sub>16</sub> -C <sub>17</sub> | 1.434 | 1.428 | 0.43% | C <sub>16</sub> -C <sub>17</sub> -C <sub>18</sub> | 117.0 | 117.5 | 0.40% |
| C <sub>17</sub> -C <sub>18</sub> | 1.432 | 1.432 | 0.03% | C <sub>17</sub> -C <sub>18</sub> -C <sub>19</sub> | 122.2 | 121.8 | 0.40% |
| C <sub>18</sub> -C <sub>19</sub> | 1.430 | 1.429 | 0.09% | C <sub>2</sub> -C <sub>1</sub> -C <sub>20</sub>   | 116.6 | 115.7 | 0.79% |
| C <sub>1</sub> -C <sub>20</sub>  | 1.436 | 1.449 | 0.90% | C <sub>20</sub> -C <sub>1</sub> -C <sub>21</sub>  | 114.4 | 113.1 | 1.13% |
| C <sub>1</sub> -C <sub>21</sub>  | 1.436 | 1.450 | 0.95% | C <sub>1</sub> -C <sub>21</sub> -C <sub>22</sub>  | 123.0 | 123.4 | 0.33% |
| C <sub>21</sub> -C <sub>22</sub> | 1.437 | 1.457 | 1.37% | C <sub>18</sub> -C <sub>19</sub> -C <sub>23</sub> | 120.4 | 120.4 | 0.01% |
| C <sub>19</sub> -C <sub>23</sub> | 1.428 | 1.429 | 0.11% | C <sub>19</sub> -C <sub>23</sub> -C <sub>24</sub> | 118.0 | 118.3 | 0.28% |
| C <sub>23</sub> -C <sub>24</sub> | 1.433 | 1.416 | 1.17% | C <sub>16</sub> -C <sub>17</sub> -C <sub>25</sub> | 117.6 | 118.3 | 0.63% |
| C <sub>17</sub> -C <sub>25</sub> | 1.433 | 1.423 | 0.70% | C <sub>17</sub> -C <sub>25</sub> -C <sub>26</sub> | 121.2 | 121.0 | 0.13% |
| C <sub>25</sub> -C <sub>26</sub> | 1.434 | 1.438 | 0.28% | C <sub>25</sub> -C <sub>26</sub> -C <sub>27</sub> | 121.0 | 120.1 | 0.80% |
| C <sub>26</sub> -C <sub>27</sub> | 1.433 | 1.419 | 1.02% | C <sub>26</sub> -C <sub>27</sub> -C <sub>28</sub> | 117.8 | 117.8 | 0.00% |
| C <sub>27</sub> -C <sub>28</sub> | 1.431 | 1.437 | 0.40% | C <sub>27</sub> -C <sub>28</sub> -C <sub>29</sub> | 123.8 | 124.2 | 0.32% |
| C <sub>28</sub> -C <sub>29</sub> | 1.431 | 1.443 | 0.85% | C <sub>28</sub> -C <sub>29</sub> -C <sub>30</sub> | 108.9 | 108.8 | 0.08% |
| C <sub>29</sub> -C <sub>30</sub> | 1.438 | 1.483 | 3.02% | C <sub>10</sub> -C <sub>11</sub> -C <sub>31</sub> | 122.9 | 123.4 | 0.35% |
| C <sub>11</sub> -C <sub>31</sub> | 1.436 | 1.450 | 0.95% | C <sub>11</sub> -C <sub>31</sub> -C <sub>32</sub> | 114.4 | 113.1 | 1.17% |
| C <sub>31</sub> -C <sub>32</sub> | 1.436 | 1.449 | 0.88% | C <sub>8</sub> -C <sub>9</sub> -C <sub>33</sub>   | 118.0 | 118.3 | 0.28% |
| C <sub>9</sub> -C <sub>33</sub>  | 1.428 | 1.429 | 0.10% | C <sub>9</sub> -C <sub>33</sub> -C <sub>34</sub>  | 120.4 | 120.4 | 0.01% |
| C <sub>33</sub> -C <sub>34</sub> | 1.430 | 1.429 | 0.09% | C <sub>6</sub> -C <sub>7</sub> -C <sub>35</sub>   | 121.2 | 121.0 | 0.12% |
| C <sub>7</sub> -C <sub>35</sub>  | 1.433 | 1.423 | 0.70% | C <sub>7</sub> -C <sub>35</sub> -C <sub>36</sub>  | 117.6 | 118.3 | 0.63% |
| C <sub>35</sub> -C <sub>36</sub> | 1.434 | 1.428 | 0.43% | C <sub>4</sub> -C <sub>5</sub> -C <sub>37</sub>   | 117.0 | 116.7 | 0.23% |
| C <sub>5</sub> -C <sub>37</sub>  | 1.429 | 1.421 | 0.56% | C <sub>5</sub> -C <sub>37</sub> -C <sub>38</sub>  | 120.3 | 120.4 | 0.08% |
| C <sub>37</sub> -C <sub>38</sub> | 1.432 | 1.452 | 1.37% | C <sub>37</sub> -C <sub>38</sub> -C <sub>39</sub> | 121.6 | 121.9 | 0.22% |
| C <sub>38</sub> -C <sub>39</sub> | 1.435 | 1.416 | 1.39% | C <sub>38</sub> -C <sub>39</sub> -C <sub>40</sub> | 116.8 | 117.6 | 0.63% |
| C <sub>39</sub> -C <sub>40</sub> | 1.427 | 1.430 | 0.18% | C <sub>39</sub> -C <sub>40</sub> -C <sub>41</sub> | 121.1 | 120.7 | 0.31% |
| C <sub>40</sub> -C <sub>41</sub> | 1.429 | 1.430 | 0.04% | C <sub>21</sub> -C <sub>22</sub> -C <sub>42</sub> | 109.0 | 108.8 | 0.18% |
| C <sub>22</sub> -C <sub>42</sub> | 1.430 | 1.429 | 0.06% | C <sub>22</sub> -C <sub>42</sub> -C <sub>43</sub> | 122.2 | 121.8 | 0.37% |
| C <sub>42</sub> -C <sub>43</sub> | 1.432 | 1.432 | 0.01% | C <sub>42</sub> -C <sub>43</sub> -C <sub>44</sub> | 117.0 | 117.4 | 0.34% |
| C <sub>43</sub> -C <sub>44</sub> | 1.433 | 1.423 | 0.71% | C <sub>43</sub> -C <sub>44</sub> -C <sub>45</sub> | 121.2 | 121.0 | 0.13% |
| C <sub>44</sub> -C <sub>45</sub> | 1.435 | 1.438 | 0.26% | C <sub>44</sub> -C <sub>45</sub> -C <sub>46</sub> | 121.0 | 121.1 | 0.79% |
| C <sub>45</sub> -C <sub>46</sub> | 1.433 | 1.419 | 0.99% | C <sub>27</sub> -C <sub>28</sub> -C <sub>47</sub> | 121.2 | 121.0 | 0.10% |
| C <sub>28</sub> -C <sub>47</sub> | 1.425 | 1.433 | 0.53% | C <sub>28</sub> -C <sub>47</sub> -C <sub>48</sub> | 107.9 | 108.6 | 0.65% |
| C <sub>47</sub> -C <sub>48</sub> | 1.431 | 1.443 | 0.81% | C <sub>47</sub> -C <sub>48</sub> -C <sub>49</sub> | 118.3 | 117.3 | 0.86% |
| C <sub>48</sub> -C <sub>49</sub> | 1.433 | 1.452 | 1.26% | C <sub>48</sub> -C <sub>49</sub> -C <sub>50</sub> | 116.5 | 116.3 | 0.21% |
| C <sub>49</sub> -C <sub>50</sub> | 1.427 | 1.429 | 0.15% | C <sub>49</sub> -C <sub>50</sub> -C <sub>51</sub> | 121.1 | 120.7 | 0.28% |
| C <sub>50</sub> -C <sub>51</sub> | 1.429 | 1.429 | 0.03% | C <sub>50</sub> -C <sub>51</sub> -C <sub>52</sub> | 122.3 | 121.9 | 0.32% |
| C <sub>51</sub> -C <sub>52</sub> | 1.432 | 1.433 | 0.13% | C <sub>51</sub> -C <sub>52</sub> -C <sub>53</sub> | 117.3 | 117.6 | 0.19% |
| C <sub>52</sub> -C <sub>53</sub> | 1.434 | 1.422 | 0.82% | C <sub>52</sub> -C <sub>53</sub> -C <sub>54</sub> | 121.0 | 121.2 | 0.65% |
| C <sub>53</sub> -C <sub>54</sub> | 1.434 | 1.436 | 0.13% | C <sub>53</sub> -C <sub>54</sub> -C <sub>55</sub> | 121.3 | 121.2 | 0.12% |
| C <sub>54</sub> -C <sub>55</sub> | 1.432 | 1.424 | 0.59% | C <sub>54</sub> -C <sub>55</sub> -C <sub>56</sub> | 117.6 | 118.4 | 0.67% |
| C <sub>55</sub> -C <sub>56</sub> | 1.434 | 1.422 | 0.83% | C <sub>42</sub> -C <sub>43</sub> -C <sub>57</sub> | 117.0 | 117.5 | 0.40% |
| C <sub>43</sub> -C <sub>57</sub> | 1.434 | 1.428 | 0.43% | C <sub>45</sub> -C <sub>46</sub> -C <sub>58</sub> | 117.6 | 118.6 | 0.84% |
| C <sub>46</sub> -C <sub>58</sub> | 1.429 | 1.421 | 0.55% | C <sub>48</sub> -C <sub>49</sub> -C <sub>59</sub> | 118.7 | 119.0 | 0.19% |
| C <sub>49</sub> -C <sub>59</sub> | 1.435 | 1.415 | 1.41% | C <sub>51</sub> -C <sub>52</sub> -C <sub>60</sub> | 116.8 | 117.1 | 0.31% |

|                                   |       |       |       |                                                    |       |       |       |
|-----------------------------------|-------|-------|-------|----------------------------------------------------|-------|-------|-------|
| C <sub>52</sub> -C <sub>60</sub>  | 1.432 | 1.424 | 0.58% | C <sub>1</sub> -C <sub>2</sub> -C <sub>61</sub>    | 120.4 | 118.9 | 1.23% |
| C <sub>2</sub> -C <sub>61</sub>   | 1.438 | 1.482 | 2.98% | C <sub>3</sub> -C <sub>4</sub> -C <sub>62</sub>    | 107.9 | 108.6 | 0.65% |
| C <sub>4</sub> -C <sub>62</sub>   | 1.425 | 1.433 | 0.53% | C <sub>4</sub> -C <sub>62</sub> -C <sub>63</sub>   | 121.3 | 121.1 | 0.16% |
| C <sub>62</sub> -C <sub>63</sub>  | 1.431 | 1.437 | 0.40% | C <sub>62</sub> -C <sub>63</sub> -C <sub>64</sub>  | 117.7 | 117.7 | 0.01% |
| C <sub>63</sub> -C <sub>64</sub>  | 1.433 | 1.419 | 1.00% | C <sub>63</sub> -C <sub>64</sub> -C <sub>65</sub>  | 121.0 | 121.1 | 0.82% |
| C <sub>64</sub> -C <sub>65</sub>  | 1.434 | 1.438 | 0.28% | C <sub>64</sub> -C <sub>65</sub> -C <sub>66</sub>  | 121.2 | 121.0 | 0.12% |
| C <sub>65</sub> -C <sub>66</sub>  | 1.433 | 1.423 | 0.70% | C <sub>9</sub> -C <sub>10</sub> -C <sub>67</sub>   | 120.4 | 120.4 | 0.02% |
| C <sub>10</sub> -C <sub>67</sub>  | 1.430 | 1.429 | 0.06% | C <sub>11</sub> -C <sub>12</sub> -C <sub>68</sub>  | 109.1 | 108.5 | 0.59% |
| C <sub>12</sub> -C <sub>68</sub>  | 1.429 | 1.430 | 0.05% | C <sub>12</sub> -C <sub>68</sub> -C <sub>69</sub>  | 122.4 | 122.0 | 0.30% |
| C <sub>68</sub> -C <sub>69</sub>  | 1.432 | 1.433 | 0.12% | C <sub>68</sub> -C <sub>69</sub> -C <sub>70</sub>  | 116.7 | 117.1 | 0.32% |
| C <sub>69</sub> -C <sub>70</sub>  | 1.432 | 1.424 | 0.59% | C <sub>69</sub> -C <sub>70</sub> -C <sub>71</sub>  | 121.3 | 121.2 | 0.11% |
| C <sub>70</sub> -C <sub>71</sub>  | 1.434 | 1.436 | 0.13% | C <sub>70</sub> -C <sub>71</sub> -C <sub>72</sub>  | 121.0 | 120.2 | 0.66% |
| C <sub>71</sub> -C <sub>72</sub>  | 1.434 | 1.422 | 0.83% | C <sub>71</sub> -C <sub>72</sub> -C <sub>73</sub>  | 117.4 | 117.6 | 0.19% |
| C <sub>72</sub> -C <sub>73</sub>  | 1.432 | 1.433 | 0.13% | C <sub>72</sub> -C <sub>73</sub> -C <sub>74</sub>  | 122.3 | 121.9 | 0.31% |
| C <sub>73</sub> -C <sub>74</sub>  | 1.429 | 1.429 | 0.03% | C <sub>73</sub> -C <sub>74</sub> -C <sub>75</sub>  | 121.1 | 120.7 | 0.30% |
| C <sub>74</sub> -C <sub>75</sub>  | 1.427 | 1.429 | 0.15% | C <sub>74</sub> -C <sub>75</sub> -C <sub>76</sub>  | 116.9 | 117.6 | 0.63% |
| C <sub>75</sub> -C <sub>76</sub>  | 1.435 | 1.415 | 1.42% | C <sub>62</sub> -C <sub>63</sub> -C <sub>77</sub>  | 117.0 | 116.7 | 0.24% |
| C <sub>63</sub> -C <sub>77</sub>  | 1.429 | 1.421 | 0.56% | C <sub>65</sub> -C <sub>66</sub> -C <sub>78</sub>  | 117.6 | 118.3 | 0.65% |
| C <sub>66</sub> -C <sub>78</sub>  | 1.434 | 1.428 | 0.44% | C <sub>68</sub> -C <sub>69</sub> -C <sub>79</sub>  | 117.4 | 117.6 | 0.16% |
| C <sub>69</sub> -C <sub>79</sub>  | 1.434 | 1.422 | 0.82% | C <sub>71</sub> -C <sub>72</sub> -Sc <sub>80</sub> | 117.6 | 118.4 | 0.67% |
| C <sub>72</sub> -C <sub>80</sub>  | 1.432 | 1.424 | 0.59% | C <sub>1</sub> -C <sub>2</sub> -Sc <sub>81</sub>   | 72.1  | 71.8  | 0.44% |
| C <sub>2</sub> -Sc <sub>81</sub>  | 2.020 | 2.142 | 5.69% | C <sub>29</sub> -C <sub>30</sub> -Sc <sub>82</sub> | 81.3  | 78.4  | 3.68% |
| C <sub>30</sub> -Sc <sub>82</sub> | 2.020 | 2.142 | 5.72% |                                                    |       |       |       |

Table S4 The structural parameters of C<sub>60</sub> from CNSc.ff and density functional theory (DFT) at B3LYP/6-31G level

|                                  | Bond    |           |       | Angle                                            |           |       |       |
|----------------------------------|---------|-----------|-------|--------------------------------------------------|-----------|-------|-------|
|                                  | CNSc.ff | DFT/6-31G | Error | CNSc.ff                                          | DFT/6-31G | Error |       |
| C <sub>2</sub> -C <sub>1</sub>   | 1.457   | 1.460     | 0.21% | C <sub>3</sub> -C <sub>1</sub> -C <sub>2</sub>   | 108.0     | 108.0 | 0.00% |
| C <sub>3</sub> -C <sub>1</sub>   | 1.457   | 1.460     | 0.21% | C <sub>4</sub> -C <sub>2</sub> -C <sub>1</sub>   | 108.0     | 108.0 | 0.00% |
| C <sub>4</sub> -C <sub>2</sub>   | 1.457   | 1.460     | 0.21% | C <sub>5</sub> -C <sub>4</sub> -C <sub>2</sub>   | 108.1     | 108.0 | 0.09% |
| C <sub>5</sub> -C <sub>4</sub>   | 1.457   | 1.460     | 0.21% | C <sub>6</sub> -C <sub>1</sub> -C <sub>2</sub>   | 120.0     | 120.0 | 0.00% |
| C <sub>6</sub> -C <sub>1</sub>   | 1.403   | 1.397     | 0.43% | C <sub>7</sub> -C <sub>2</sub> -C <sub>1</sub>   | 120.0     | 120.0 | 0.00% |
| C <sub>7</sub> -C <sub>2</sub>   | 1.402   | 1.397     | 0.36% | C <sub>8</sub> -C <sub>3</sub> -C <sub>1</sub>   | 120.0     | 120.0 | 0.00% |
| C <sub>8</sub> -C <sub>3</sub>   | 1.402   | 1.397     | 0.36% | C <sub>9</sub> -C <sub>6</sub> -C <sub>1</sub>   | 120.0     | 120.0 | 0.00% |
| C <sub>9</sub> -C <sub>6</sub>   | 1.457   | 1.460     | 0.21% | C <sub>10</sub> -C <sub>6</sub> -C <sub>1</sub>  | 120.0     | 120.0 | 0.00% |
| C <sub>10</sub> -C <sub>6</sub>  | 1.457   | 1.460     | 0.21% | C <sub>11</sub> -C <sub>9</sub> -C <sub>6</sub>  | 120.0     | 120.0 | 0.00% |
| C <sub>11</sub> -C <sub>9</sub>  | 1.402   | 1.397     | 0.36% | C <sub>12</sub> -C <sub>10</sub> -C <sub>6</sub> | 120.0     | 120.0 | 0.00% |
| C <sub>12</sub> -C <sub>10</sub> | 1.402   | 1.397     | 0.36% | C <sub>13</sub> -C <sub>4</sub> -C <sub>2</sub>  | 120.0     | 120.0 | 0.00% |
| C <sub>13</sub> -C <sub>4</sub>  | 1.402   | 1.397     | 0.36% | C <sub>14</sub> -C <sub>5</sub> -C <sub>4</sub>  | 120.0     | 120.0 | 0.00% |
| C <sub>14</sub> -C <sub>5</sub>  | 1.401   | 1.397     | 0.29% | C <sub>15</sub> -C <sub>7</sub> -C <sub>2</sub>  | 120.0     | 120.0 | 0.00% |
| C <sub>15</sub> -C <sub>7</sub>  | 1.457   | 1.460     | 0.21% | C <sub>16</sub> -C <sub>8</sub> -C <sub>3</sub>  | 120.0     | 120.0 | 0.00% |

|                                  |       |       |       |                                                   |       |       |       |
|----------------------------------|-------|-------|-------|---------------------------------------------------|-------|-------|-------|
| C <sub>16</sub> -C <sub>8</sub>  | 1.457 | 1.460 | 0.21% | C <sub>17</sub> -C <sub>15</sub> -C <sub>7</sub>  | 120.0 | 120.0 | 0.00% |
| C <sub>17</sub> -C <sub>15</sub> | 1.402 | 1.397 | 0.36% | C <sub>18</sub> -C <sub>16</sub> -C <sub>8</sub>  | 120.0 | 120.0 | 0.00% |
| C <sub>18</sub> -C <sub>16</sub> | 1.402 | 1.397 | 0.36% | C <sub>19</sub> -C <sub>9</sub> -C <sub>6</sub>   | 108.0 | 108.0 | 0.00% |
| C <sub>19</sub> -C <sub>9</sub>  | 1.457 | 1.460 | 0.21% | C <sub>20</sub> -C <sub>10</sub> -C <sub>6</sub>  | 108.0 | 108.0 | 0.00% |
| C <sub>20</sub> -C <sub>10</sub> | 1.457 | 1.460 | 0.21% | C <sub>21</sub> -C <sub>13</sub> -C <sub>4</sub>  | 120.0 | 120.0 | 0.00% |
| C <sub>21</sub> -C <sub>13</sub> | 1.457 | 1.460 | 0.21% | C <sub>22</sub> -C <sub>21</sub> -C <sub>13</sub> | 120.0 | 120.0 | 0.00% |
| C <sub>22</sub> -C <sub>21</sub> | 1.401 | 1.397 | 0.29% | C <sub>23</sub> -C <sub>11</sub> -C <sub>9</sub>  | 120.0 | 120.0 | 0.00% |
| C <sub>23</sub> -C <sub>11</sub> | 1.457 | 1.460 | 0.21% | C <sub>24</sub> -C <sub>12</sub> -C <sub>10</sub> | 120.0 | 120.0 | 0.00% |
| C <sub>24</sub> -C <sub>12</sub> | 1.457 | 1.460 | 0.21% | C <sub>25</sub> -C <sub>23</sub> -C <sub>11</sub> | 108.0 | 108.0 | 0.00% |
| C <sub>25</sub> -C <sub>23</sub> | 1.457 | 1.460 | 0.21% | C <sub>26</sub> -C <sub>24</sub> -C <sub>12</sub> | 108.0 | 108.0 | 0.00% |
| C <sub>26</sub> -C <sub>24</sub> | 1.457 | 1.460 | 0.21% | C <sub>27</sub> -C <sub>17</sub> -C <sub>15</sub> | 120.0 | 120.0 | 0.00% |
| C <sub>27</sub> -C <sub>17</sub> | 1.457 | 1.460 | 0.21% | C <sub>28</sub> -C <sub>18</sub> -C <sub>16</sub> | 120.1 | 120.0 | 0.09% |
| C <sub>28</sub> -C <sub>18</sub> | 1.457 | 1.460 | 0.21% | C <sub>29</sub> -C <sub>27</sub> -C <sub>17</sub> | 108.0 | 108.0 | 0.00% |
| C <sub>29</sub> -C <sub>27</sub> | 1.456 | 1.460 | 0.27% | C <sub>30</sub> -C <sub>19</sub> -C <sub>9</sub>  | 120.0 | 120.0 | 0.00% |
| C <sub>30</sub> -C <sub>19</sub> | 1.402 | 1.397 | 0.36% | C <sub>31</sub> -C <sub>22</sub> -C <sub>21</sub> | 120.0 | 120.0 | 0.00% |
| C <sub>31</sub> -C <sub>22</sub> | 1.457 | 1.460 | 0.21% | C <sub>32</sub> -C <sub>20</sub> -C <sub>10</sub> | 120.0 | 120.0 | 0.00% |
| C <sub>32</sub> -C <sub>20</sub> | 1.402 | 1.397 | 0.36% | C <sub>33</sub> -C <sub>23</sub> -C <sub>11</sub> | 120.0 | 120.0 | 0.00% |
| C <sub>33</sub> -C <sub>23</sub> | 1.402 | 1.397 | 0.36% | C <sub>34</sub> -C <sub>24</sub> -C <sub>12</sub> | 120.0 | 120.0 | 0.00% |
| C <sub>34</sub> -C <sub>24</sub> | 1.401 | 1.397 | 0.29% | C <sub>35</sub> -C <sub>25</sub> -C <sub>23</sub> | 120.0 | 120.0 | 0.00% |
| C <sub>35</sub> -C <sub>25</sub> | 1.401 | 1.397 | 0.29% | C <sub>36</sub> -C <sub>26</sub> -C <sub>24</sub> | 120.0 | 120.0 | 0.00% |
| C <sub>36</sub> -C <sub>26</sub> | 1.402 | 1.397 | 0.36% | C <sub>37</sub> -C <sub>27</sub> -C <sub>17</sub> | 120.0 | 120.0 | 0.00% |
| C <sub>37</sub> -C <sub>27</sub> | 1.402 | 1.397 | 0.36% | C <sub>38</sub> -C <sub>28</sub> -C <sub>18</sub> | 120.0 | 120.0 | 0.00% |
| C <sub>38</sub> -C <sub>28</sub> | 1.401 | 1.397 | 0.29% | C <sub>39</sub> -C <sub>30</sub> -C <sub>19</sub> | 119.9 | 120.0 | 0.09% |
| C <sub>39</sub> -C <sub>30</sub> | 1.457 | 1.460 | 0.21% | C <sub>40</sub> -C <sub>39</sub> -C <sub>30</sub> | 120.0 | 120.0 | 0.00% |
| C <sub>40</sub> -C <sub>39</sub> | 1.402 | 1.397 | 0.36% | C <sub>41</sub> -C <sub>29</sub> -C <sub>27</sub> | 120.0 | 120.0 | 0.00% |
| C <sub>41</sub> -C <sub>29</sub> | 1.402 | 1.397 | 0.36% | C <sub>42</sub> -C <sub>31</sub> -C <sub>22</sub> | 119.9 | 120.0 | 0.09% |
| C <sub>42</sub> -C <sub>31</sub> | 1.402 | 1.397 | 0.36% | C <sub>43</sub> -C <sub>33</sub> -C <sub>23</sub> | 120.0 | 120.0 | 0.00% |
| C <sub>43</sub> -C <sub>33</sub> | 1.457 | 1.460 | 0.21% | C <sub>44</sub> -C <sub>34</sub> -C <sub>24</sub> | 120.0 | 120.0 | 0.00% |
| C <sub>44</sub> -C <sub>34</sub> | 1.457 | 1.460 | 0.21% | C <sub>45</sub> -C <sub>43</sub> -C <sub>33</sub> | 120.0 | 120.0 | 0.00% |
| C <sub>45</sub> -C <sub>43</sub> | 1.402 | 1.397 | 0.36% | C <sub>46</sub> -C <sub>44</sub> -C <sub>34</sub> | 120.0 | 120.0 | 0.00% |
| C <sub>46</sub> -C <sub>44</sub> | 1.402 | 1.397 | 0.36% | C <sub>47</sub> -C <sub>39</sub> -C <sub>30</sub> | 108.0 | 108.0 | 0.00% |
| C <sub>47</sub> -C <sub>39</sub> | 1.457 | 1.460 | 0.21% | C <sub>48</sub> -C <sub>44</sub> -C <sub>34</sub> | 108.0 | 108.0 | 0.00% |
| C <sub>48</sub> -C <sub>44</sub> | 1.457 | 1.460 | 0.21% | C <sub>49</sub> -C <sub>37</sub> -C <sub>27</sub> | 120.0 | 120.0 | 0.00% |
| C <sub>49</sub> -C <sub>37</sub> | 1.457 | 1.460 | 0.21% | C <sub>50</sub> -C <sub>38</sub> -C <sub>28</sub> | 120.0 | 120.0 | 0.00% |
| C <sub>50</sub> -C <sub>38</sub> | 1.457 | 1.460 | 0.21% | C <sub>51</sub> -C <sub>49</sub> -C <sub>37</sub> | 120.0 | 120.0 | 0.00% |
| C <sub>51</sub> -C <sub>49</sub> | 1.401 | 1.397 | 0.29% | C <sub>52</sub> -C <sub>50</sub> -C <sub>38</sub> | 120.0 | 120.0 | 0.00% |
| C <sub>52</sub> -C <sub>50</sub> | 1.402 | 1.397 | 0.36% | C <sub>53</sub> -C <sub>49</sub> -C <sub>37</sub> | 108.0 | 108.0 | 0.00% |
| C <sub>53</sub> -C <sub>49</sub> | 1.451 | 1.460 | 0.62% | C <sub>54</sub> -C <sub>46</sub> -C <sub>44</sub> | 120.0 | 120.0 | 0.00% |
| C <sub>54</sub> -C <sub>46</sub> | 1.457 | 1.460 | 0.21% | C <sub>55</sub> -C <sub>52</sub> -C <sub>50</sub> | 119.9 | 120.0 | 0.09% |
| C <sub>55</sub> -C <sub>52</sub> | 1.457 | 1.460 | 0.21% | C <sub>56</sub> -C <sub>47</sub> -C <sub>39</sub> | 120.0 | 120.0 | 0.00% |
| C <sub>56</sub> -C <sub>47</sub> | 1.402 | 1.397 | 0.36% | C <sub>57</sub> -C <sub>48</sub> -C <sub>44</sub> | 119.9 | 120.0 | 0.09% |
| C <sub>57</sub> -C <sub>48</sub> | 1.402 | 1.397 | 0.36% | C <sub>58</sub> -C <sub>53</sub> -C <sub>49</sub> | 120.0 | 120.0 | 0.00% |
| C <sub>58</sub> -C <sub>53</sub> | 1.401 | 1.397 | 0.29% | C <sub>59</sub> -C <sub>54</sub> -C <sub>46</sub> | 120.0 | 120.0 | 0.00% |
| C <sub>59</sub> -C <sub>54</sub> | 1.401 | 1.397 | 0.29% | C <sub>60</sub> -C <sub>55</sub> -C <sub>52</sub> | 120.0 | 120.0 | 0.00% |



|                 |       |       |       |
|-----------------|-------|-------|-------|
| $C_{60}-C_{55}$ | 1.402 | 1.397 | 0.36% |
|-----------------|-------|-------|-------|

Table S5 The structural parameters of  $CH_2NH$  from CNSc.ff and density functional theory (DFT) at B3LYP/6-31G level

|           | Bond    |           |       | Angle         |           |       |       |
|-----------|---------|-----------|-------|---------------|-----------|-------|-------|
|           | CNSc.ff | DFT/6-31G | Error | CNSc.ff       | DFT/6-31G | Error |       |
| $C_1-H_2$ | 1.105   | 1.097     | 0.73% | $H_2-C_1-H_3$ | 120.5     | 115.7 | 4.15% |
| $C_1-H_3$ | 1.102   | 1.089     | 1.19% | $H_3-C_1-N_4$ | 117.7     | 118.4 | 0.59% |
| $C_1-N_4$ | 1.239   | 1.282     | 3.35% | $C_1-N_4-H_5$ | 109.8     | 113.6 | 3.35% |
| $N_4-H_5$ | 0.997   | 1.032     | 3.39% |               |           |       |       |

Table S6 The structural parameters of  $Sc_2C_2$  from CNSc.ff and density functional theory (DFT) at B3LYP/6-31G level

|             | Bond    |           |       | Angle           |           |       |       |
|-------------|---------|-----------|-------|-----------------|-----------|-------|-------|
|             | CNSc.ff | DFT/6-31G | Error | CNSc.ff         | DFT/6-31G | Error |       |
| $Sc_1-Sc_2$ | 3.794   | 3.883     | 2.29% | $Sc_2-Sc_1-C_3$ | 18.3      | 19.7  | 7.11% |
| $Sc_1-C_3$  | 2.023   | 2.062     | 1.89% | $Sc_1-C_3-C_4$  | 68.7      | 70.3  | 2.28% |
| $C_3-C_4$   | 1.366   | 1.390     | 1.73% |                 |           |       |       |

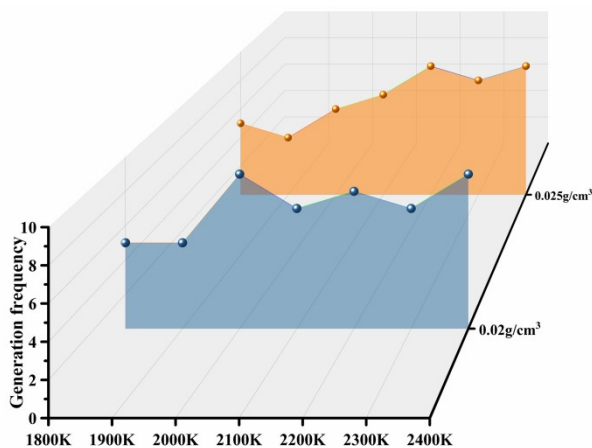

Fig. S2 Generation frequency of  $Sc_3N@C_n$

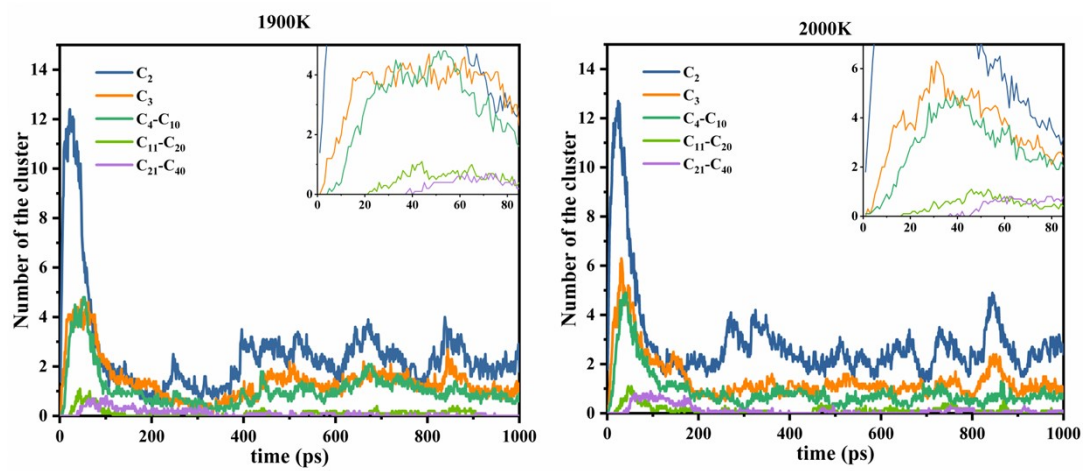

Fig. S3 The number of different clusters during the simulation

## ReaxFF Force Field

39 ! Number of general parameters  
50.0000 !p\_boc1 Eq(4c): Overcoordination parameter  
9.5469 !p\_boc2 Eq(4d): Overcoordination parameter  
26.5405 !p\_coa2 Eq(15): Valency angle conjugation  
1.7224 !p\_trip4 Eq(20): Triple bond stabilisation  
6.8702 !p\_trip3 Eq(20): Triple bond stabilisation  
60.4850 !k\_c2 Eq(19): C2-correction  
1.0588 !p\_ovun6 Eq(12): Undercoordination  
4.6000 !p\_trip2 Eq(20): Triple bond stabilisation  
12.1176 !p\_ovun7 Eq(12): Undercoordination  
13.3056 !p\_ovun8 Eq(12): Undercoordination  
-70.5044 !p\_trip1 Eq(20): Triple bond stabilization  
0.0000 !Lower Taper-radius (must be 0)  
10.0000 !R\_cut Eq(21): Upper Taper-radius  
2.8793 !p\_fe1 Eq(6a): Fe dimer correction  
33.8667 !p\_val6 Eq(13c): Valency undercoordination  
6.0891 !p\_lp1 Eq(8): Lone pair param  
1.0563 !p\_val9 Eq(13f): Valency angle exponent  
2.0384 !p\_val10 Eq(13g): Valency angle parameter  
6.1431 !p\_fe2 Eq(6a): Fe dimer correction  
6.9290 !p\_pen2 Eq(14a): Double bond/angle param  
0.3989 !p\_pen3 Eq(14a): Double bond/angle param  
3.9954 !p\_pen4 Eq(14a): Double bond/angle param  
-2.4837 !p\_fe3 Eq(6a): Fe dimer correction  
5.7796 !p\_tor2 Eq(16b): Torsion/BO parameter  
10.0000 !p\_tor3 Eq(16c): Torsion overcoordination  
1.9487 !p\_tor4 Eq(16c): Torsion overcoordination  
-1.2327 !p\_elho Eq(26a): electron-hole interaction  
2.1645 !p\_cot2 Eq(17b): Conjugation if tors13=0  
1.5591 !p\_vdW1 Eq(23b): vdWaals shielding  
0.1000 !Cutoff for bond order (\*100)  
2.1365 !p\_coa4 Eq(15): Valency angle conjugation  
0.6991 !p\_ovun4 Eq(11b): Over/Undercoordination  
50.0000 !p\_ovun3 Eq(11b): Over/Undercoordination  
1.8512 !p\_val8 Eq(13d): Valency/lone pair param  
0.5000 !X\_soft Eq(25): ACKS2 softness for X\_ij  
20.0000 !d Eq(23d): Scale factor in lg-dispersion  
5.0000 !p\_val Eq(27): Gauss exponent for electrons  
0.0000 !1 Eq(13e): disable undecoord in val angle  
2.6962 !p\_coa3 Eq(15): Valency angle conjugation  
5 ! Nr of atoms; cov.r; valency;a.m;Rvdw;Evdw;gammaEEM;cov.r2;#  
alfa;gammavdW;valency;Eunder;Eover;chiEEM;etaEEM;n.u.

```

cov r3;Elp;Heat inc.;bo131;bo132;bo133;softcut;n.u.
ov/un;vall;n.u.;val3,vval4
C  1.3674  4.0000 12.0000  2.0453  0.1444  0.8458  1.1706  4.0000
   9.0000  1.5000  4.0000 29.4878 79.5548  5.4674  6.0000  0.0000
   1.1668  0.0000 181.0000 14.2732 24.4406  6.7313  0.8558  0.0000
  -3.9334  5.0008  1.0564  4.0000  2.9663  0.0500  0.0000  0.0000
H   0.8930  1.0000  1.0080  1.3550  0.0930  0.8203 -0.1000  1.0000
   8.2230 33.2894  1.0000  0.0000 121.1250  3.7248  9.6093  1.0000
  -0.1000  0.0000 55.1878  3.0408  2.4197  0.0003  1.0698  0.0000
 -19.4571  4.2733  1.0338  1.0000  2.8793  0.0000  0.0000  0.0000
N   1.1466  3.0000 14.0000  2.3431  0.1082  0.6787  1.1548  5.0000
  12.0736  4.5288  4.0000 28.0790 100.0000  6.6446  6.5375  2.0000
   1.3613 15.2860 129.9837 122.4282 13.8571 11.1468  0.9845  0.0000
  -6.2500  2.6000  1.0183  4.0000  3.0303  0.0000  0.0000  0.0000
Sc  2.0802  3.0000 44.9559  1.0956  0.1498  0.5275 -1.0000  3.0000
  11.0202  1.6000  3.0000 13.8863 86.7409 -5.7129  7.4745  0.0000
  -1.0000  0.0000 91.7672  0.0138  0.0051  5.2540  1.1007  0.0000
   0.0000  2.0733  1.0094  1.5000  2.9861  0.0000  0.0000  0.0000
He -0.1000  2.0000  4.0026  1.3000  0.0050  0.5000 -0.1000  4.0000
  12.0000  4.0000  4.0000  0.0000  0.0000  5.0000 13.0000  0.0000
  -0.1000  0.0000 -2.3700  6.4918  8.5961  0.2368 10.8563  0.0000
  -5.0000  3.1873  1.0338  6.2998  2.5791  2.0000  3.0000 11.5000
9   ! Nr of bonds; Edis1;LPpen;n.u.;pbe1;pbo5;l3corr;pbo6
      pbe2;pbo3;pbo4;n.u.;pbo1;pbo2;ovcorr
1  1  88.8853 107.9956 52.0729  0.5218 -0.3647  1.0000 34.9982  0.7768
   6.1249 -0.1693  8.0821  1.0000 -0.0586  8.1832  1.0000  0.0000
1  2 169.4760  0.0000  0.0000 -0.6083  0.0000  1.0000  6.0000  0.7652
   5.2290  1.0000  0.0000  1.0000 -0.0553  6.9316  0.0000  0.0000
2  2 153.3934  0.0000  0.0000 -0.4600  0.0000  1.0000  6.0000  0.7300
   6.2500  1.0000  0.0000  1.0000 -0.0790  6.0552  0.0000  0.0000
1  3 165.9874 115.0965  0.0000 -0.7037 -0.0300  1.0000 18.0000  0.6593
   1.2099 -0.2441  4.3694  1.0000 -0.2365  7.8000  1.0000  0.0000
3  3 110.7384  0.0000  0.0000  0.3110 -0.1184  1.0000 10.0000  0.4428
   0.5588 -0.2000  8.0186  1.0000 -0.0591  4.9971  1.0000  0.0000
2  3 208.1369  0.0000  0.0000 -0.3949  0.0000  1.0000  6.0000  0.3340
   6.0174  1.0000  0.0000  1.0000 -0.1026  5.5235  0.0000  0.0000
1  4  78.0000  0.0000  0.0000  0.2500 -0.5000  1.0000 35.0000  0.6000
   0.4000 -0.2500 15.0000  1.0000 -0.1000 10.0000  1.0000  0.0000
3  4 750.0000  0.0000  0.0000  0.3300 -0.3000  1.0000 36.0000  0.5500
   0.3400 -0.2000 15.0000  1.0000 -0.1000 10.0000  1.0000  0.0000
4  4  56.8290  0.0000  0.0000  0.6031 -0.2000  1.0000 16.0000  0.4442
   0.4759 -0.2500 15.0000  1.0000 -0.1789  8.7946  0.0000  0.0000
5   ! Nr of off-diagonal terms; Ediss;Ro;gamma;rsigma;rpi;rpi2
1  2  0.1239  1.4004  9.8467  1.1210 -1.0000 -1.0000

```

|    |                                                               |        |          |         |         |         |         |         |        |        |
|----|---------------------------------------------------------------|--------|----------|---------|---------|---------|---------|---------|--------|--------|
| 2  | 3                                                             | 0.1275 | 1.3000   | 9.8924  | 1.0418  | -1.0000 | -1.0000 |         |        |        |
| 1  | 3                                                             | 0.2092 | 1.9013   | 9.5854  | 1.3184  | 1.2195  | 1.1533  |         |        |        |
| 1  | 4                                                             | 0.1290 | 1.6500   | 10.5600 | 1.2900  | -1.0000 | -1.0000 |         |        |        |
| 3  | 4                                                             | 0.0959 | 1.6800   | 10.7589 | 2.0129  | -1.0000 | -1.0000 |         |        |        |
| 18 | ! Nr of angles;at1;at2;at3;Thetao,o;ka;kb;pv1;pv2             |        |          |         |         |         |         |         |        |        |
| 1  | 1                                                             | 1      | 68.1748  | 30.9669 | 0.9699  | 0.0000  | 0.0082  | 0.3589  | 2.5747 |        |
| 1  | 1                                                             | 2      | 65.7758  | 14.5234 | 6.2481  | 0.0000  | 0.5665  | 0.0000  | 1.6255 |        |
| 2  | 1                                                             | 2      | 70.2607  | 25.2202 | 3.7312  | 0.0000  | 0.0050  | 0.0000  | 2.7500 |        |
| 1  | 2                                                             | 2      | 0.0000   | 0.0000  | 6.0000  | 0.0000  | 0.0000  | 0.0000  | 1.0400 |        |
| 1  | 2                                                             | 1      | 0.0000   | 3.4110  | 7.7350  | 0.0000  | 0.0000  | 0.0000  | 1.0400 |        |
| 2  | 2                                                             | 2      | 0.0000   | 27.9213 | 5.8635  | 0.0000  | 0.0000  | 0.0000  | 1.0400 |        |
| 2  | 1                                                             | 3      | 63.9629  | 41.6246 | 1.4921  | 0.0000  | 0.2000  | 0.0000  | 2.8070 |        |
| 1  | 2                                                             | 3      | 0.0000   | 0.0019  | 6.3000  | 0.0000  | 0.0000  | 0.0000  | 1.0400 |        |
| 2  | 3                                                             | 3      | 79.7136  | 45.0000 | 0.5316  | 0.0000  | 0.5437  | 0.0000  | 1.0000 |        |
| 2  | 3                                                             | 2      | 80.2201  | 6.8385  | 7.5000  | 0.0000  | 0.1000  | 0.0000  | 1.0000 |        |
| 1  | 2                                                             | 3      | 0.0000   | 0.2694  | 2.1363  | 0.0000  | 0.0000  | 0.0000  | 1.8036 |        |
| 3  | 2                                                             | 3      | 0.0000   | 0.0100  | 1.0929  | 0.0000  | 0.0000  | 0.0000  | 2.1728 |        |
| 2  | 2                                                             | 3      | 0.0000   | 0.0019  | 6.0000  | 0.0000  | 0.0000  | 0.0000  | 1.0400 |        |
| 1  | 1                                                             | 3      | 0.0000   | 20.0000 | 2.2491  | 0.0000  | 1.1834  | 0.0000  | 3.0000 |        |
| 3  | 1                                                             | 3      | 112.4210 | 70.1792 | 0.6055  | 0.0000  | 2.6055  | 0.0000  | 2.6000 |        |
| 1  | 3                                                             | 1      | 71.6778  | 10.6495 | 3.0486  | 0.0000  | 3.2902  | 98.5000 | 1.4000 |        |
| 1  | 3                                                             | 3      | 0.0000   | 0.0000  | 2.8540  | -1.0000 | 2.8701  | 0.0000  | 1.0631 |        |
| 3  | 3                                                             | 3      | 0.0000   | 0.0000  | 2.2561  | 0.0000  | 2.9983  | 0.0000  | 2.1573 |        |
| 17 | ! Nr of torsions;at1;at2;at3;at4;;V1;V2;V3;V2(BO);vconj;n.u;n |        |          |         |         |         |         |         |        |        |
| 1  | 1                                                             | 1      | 1        | 2.1207  | 26.8713 | 0.5160  | -9.0000 | -2.8394 | 0.0000 | 0.0000 |
| 1  | 1                                                             | 1      | 2        | -0.2500 | 29.2131 | 0.2945  | -4.9581 | -2.1802 | 0.0000 | 0.0000 |
| 2  | 1                                                             | 1      | 2        | -0.2500 | 31.2081 | 0.4539  | -4.8923 | -2.2677 | 0.0000 | 0.0000 |
| 1  | 1                                                             | 3      | 2        | -1.0000 | 71.4280 | -0.5000 | -8.0000 | -1.9825 | 0.0000 | 0.0000 |
| 2  | 1                                                             | 3      | 2        | -1.0000 | 63.9914 | 0.7449  | -8.0000 | -2.1051 | 0.0000 | 0.0000 |
| 3  | 1                                                             | 1      | 3        | -1.0000 | 21.8427 | 1.0000  | -4.0686 | -1.7241 | 0.0000 | 0.0000 |
| 1  | 1                                                             | 3      | 1        | 1.0000  | 83.8750 | 1.0000  | -6.5279 | -1.6589 | 0.0000 | 0.0000 |
| 2  | 1                                                             | 1      | 3        | 1.0000  | 98.8297 | -0.2745 | -4.9954 | -1.9000 | 0.0000 | 0.0000 |
| 2  | 3                                                             | 1      | 3        | 0.5000  | 2.8273  | -0.1650 | -7.9605 | -2.0202 | 0.0000 | 0.0000 |
| 1  | 3                                                             | 1      | 2        | -1.0000 | 92.9120 | -0.4541 | -7.7688 | -1.5996 | 0.0000 | 0.0000 |
| 0  | 1                                                             | 2      | 0        | 0.0000  | 0.0000  | 0.0000  | 0.0000  | 0.0000  | 0.0000 | 0.0000 |
| 0  | 2                                                             | 2      | 0        | 0.0000  | 0.0000  | 0.0000  | 0.0000  | 0.0000  | 0.0000 | 0.0000 |
| 0  | 1                                                             | 1      | 0        | 0.0000  | 50.0000 | 0.3000  | -4.0000 | -2.0000 | 0.0000 | 0.0000 |
| 0  | 1                                                             | 3      | 0        | 0.2176  | 40.4126 | 0.3535  | -3.9875 | -2.0051 | 0.0000 | 0.0000 |
| 0  | 2                                                             | 3      | 0        | 0.0000  | 0.1032  | 0.3000  | -5.0965 | 0.0000  | 0.0000 | 0.0000 |
| 0  | 3                                                             | 3      | 0        | 0.7265  | 44.3155 | 1.0000  | -4.4046 | -2.0000 | 0.0000 | 0.0000 |
| 3  | 1                                                             | 3      | 3        | -0.0949 | 8.7582  | 0.3310  | -7.9430 | -2.0000 | 0.0000 | 0.0000 |
| 0  | ! Nr of hydrogen bonds;at1;at2;at3;Rhb;Dehb;vhb1              |        |          |         |         |         |         |         |        |        |
